# Supplementary material for: The Matricellular Protein CCN5 (WISP2) inhibits Cellular Senescence in Cardiac Myocytes and Fibroblasts
Source: Research Square preprint supplement (doi:10.21203/rs.3.rs-7635827/v1), 2025-10-07

## **Supplementary Data**

### **The Matricellular Protein CCN5 (WISP2) inhibits Cellular Senescence in Cardiac Myocytes and Fibroblasts**

Yongjoon Jo, Miyoung Lee, Sung Bin Kim, Tae Hwan Kwak, Dongtak Jeong, Seung Pil Jang  
and Woo Jin Park

**Supplementary Figure 1.**

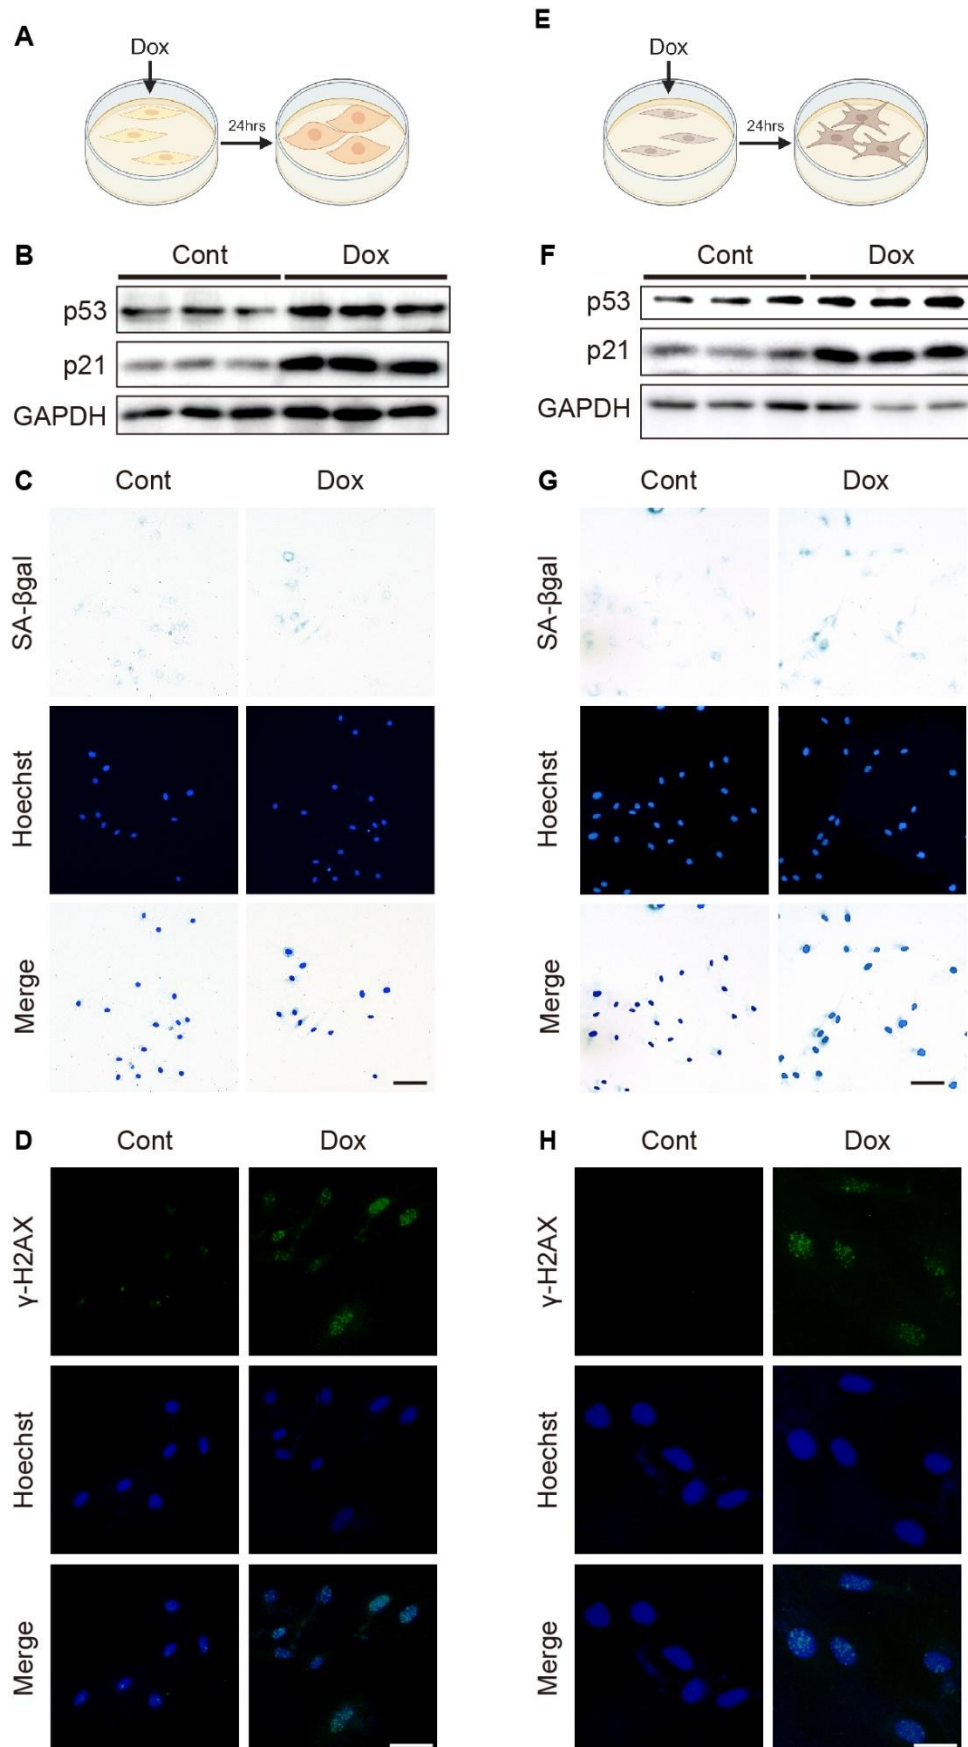

Doxorubicin (Dox) Induces Cellular Senescence in Cardiac Myocytes and Fibroblasts. (A) An experimental scheme is shown (created using Biorender). (B) H9c2 cardiac myocytes were treated with Dox. Cell lysates were immunoblotted for senescence marker proteins p53, p21 and GAPDH. Panel B is a composite from separate blots. The full-length blots are presented in Supplementary information. (C) H9c2 cells were stained for SA- $\beta$ -gal activity. (D) H9c2 cells were immunostained with antibodies against  $\gamma$ H2AX (green) and counter-stained with Hoechst (blue). (E) An experimental scheme is shown (created using Biorender). (F) RCFs were treated with Dox. Cell lysates were immunoblotted for senescence marker proteins p53, p21 and GAPDH. Panel F is a composite from separate blots. The full-length blots are presented in Supplementary information. (G) RCFs were stained for SA- $\beta$ -gal activity. (H) RCFs were immunostained with antibodies against  $\gamma$ H2AX (green) and counter-stained with Hoechst (blue). Scale bar: 50  $\mu$ m.

**Supplementary Figure 2.**

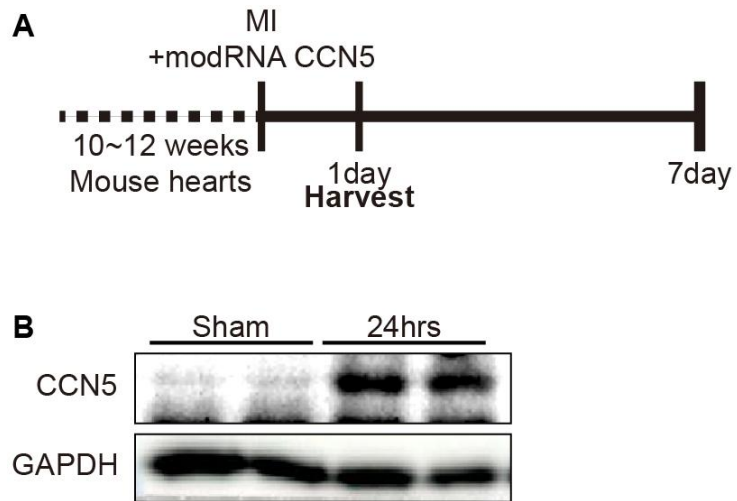

ModRNA-CCN5 was expressed via intramyocardial injection (A) An experimental scheme is shown. (B) Heart extract was immunoblotted for CCN5 and GAPDH. Panel B is a composite from separate blots. The full-length blots are presented in Supplementary information.

### Supplementary Figure 3. Western Blots Uncropped Images

Protein ladder information: PageRuler™ Prestained Protein Ladder, 10 to 180 kDa (CST 26616)

Figure 1B

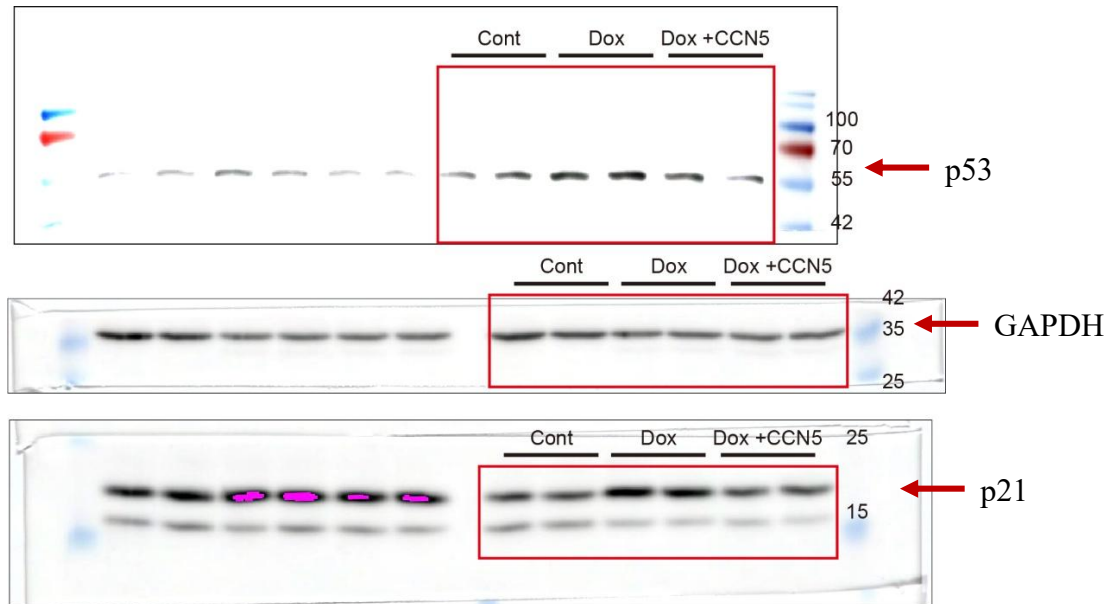

Figure 2B

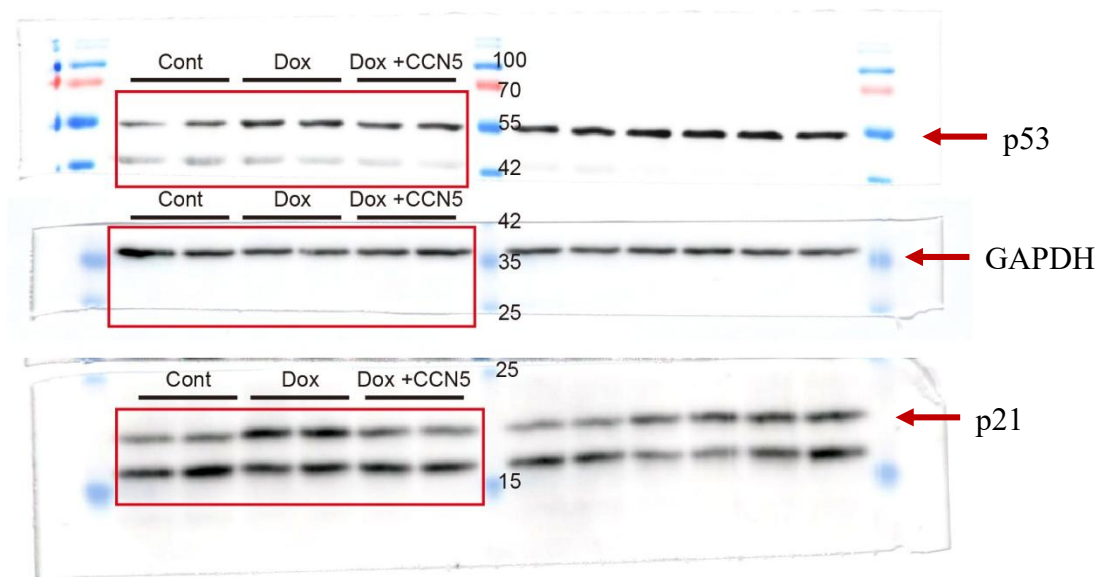

Figure 3B

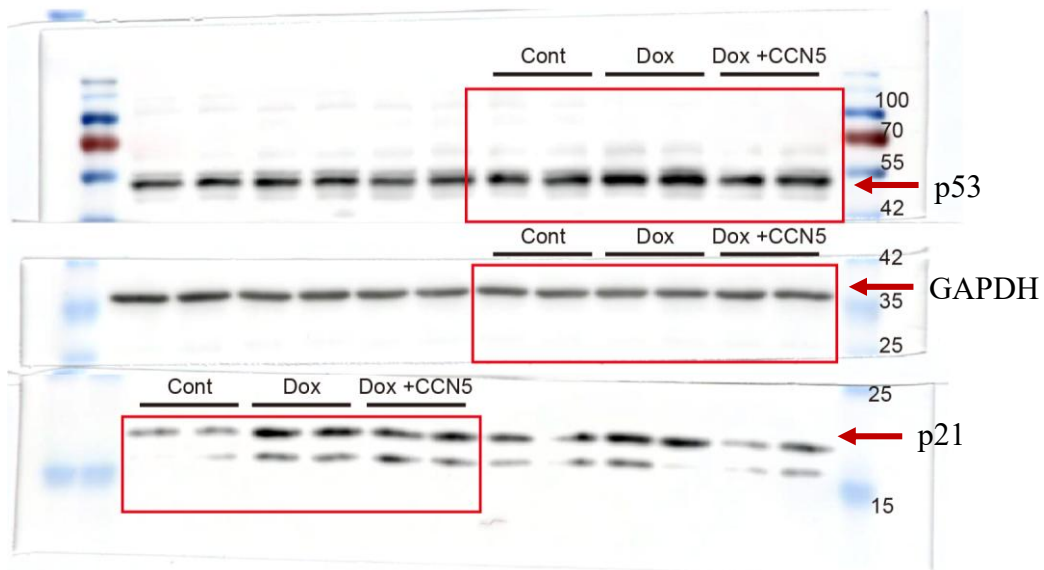

Figure 4B

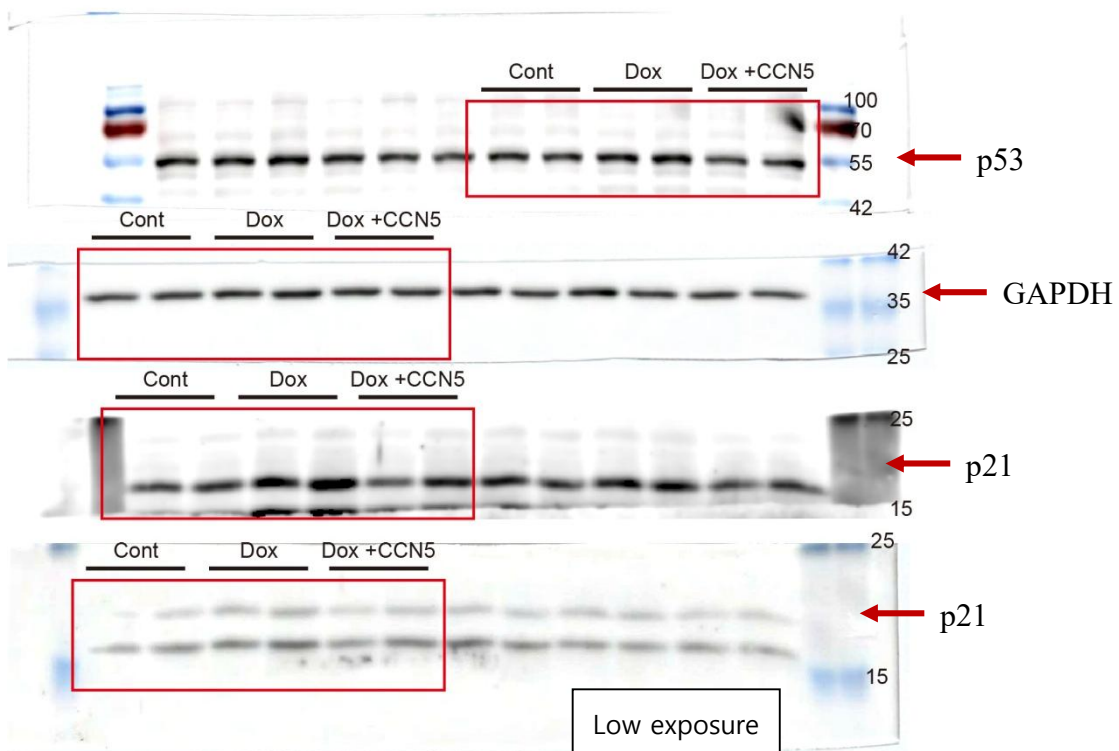

Figure 5B

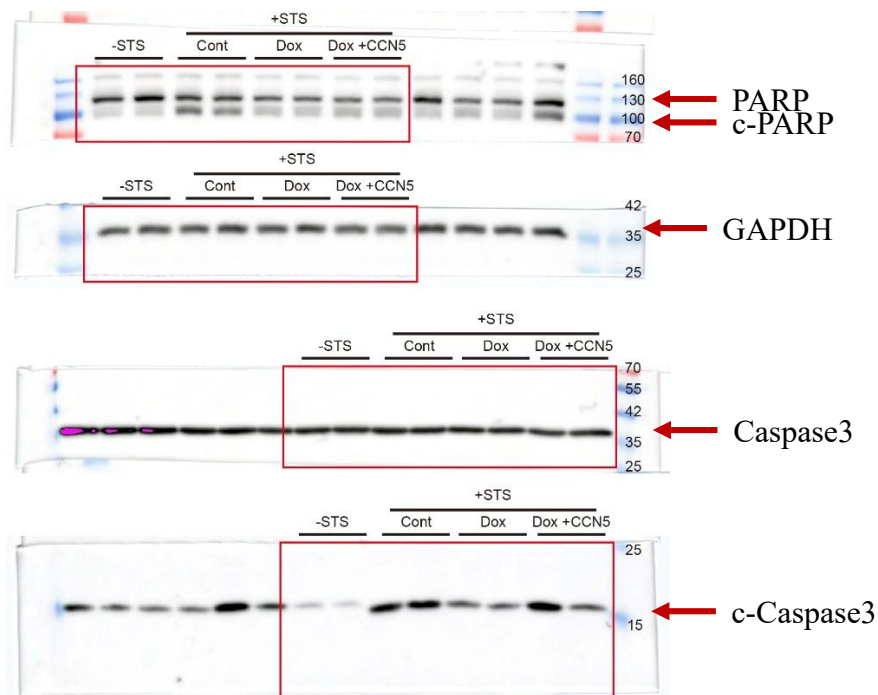

Figure 5E

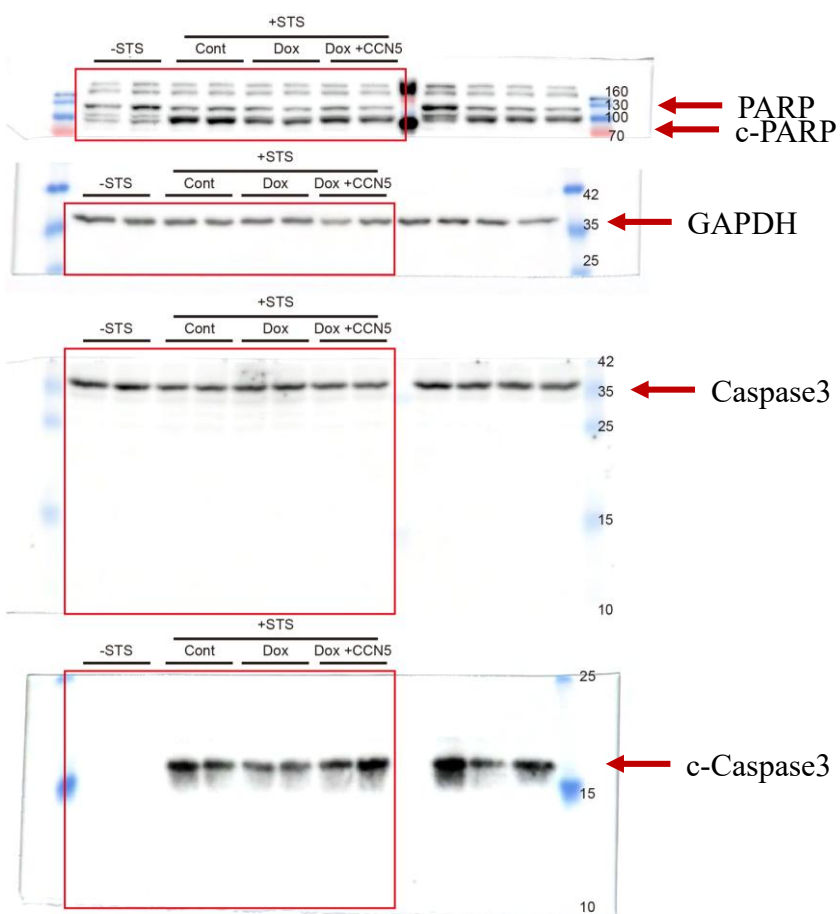

Figure 6B

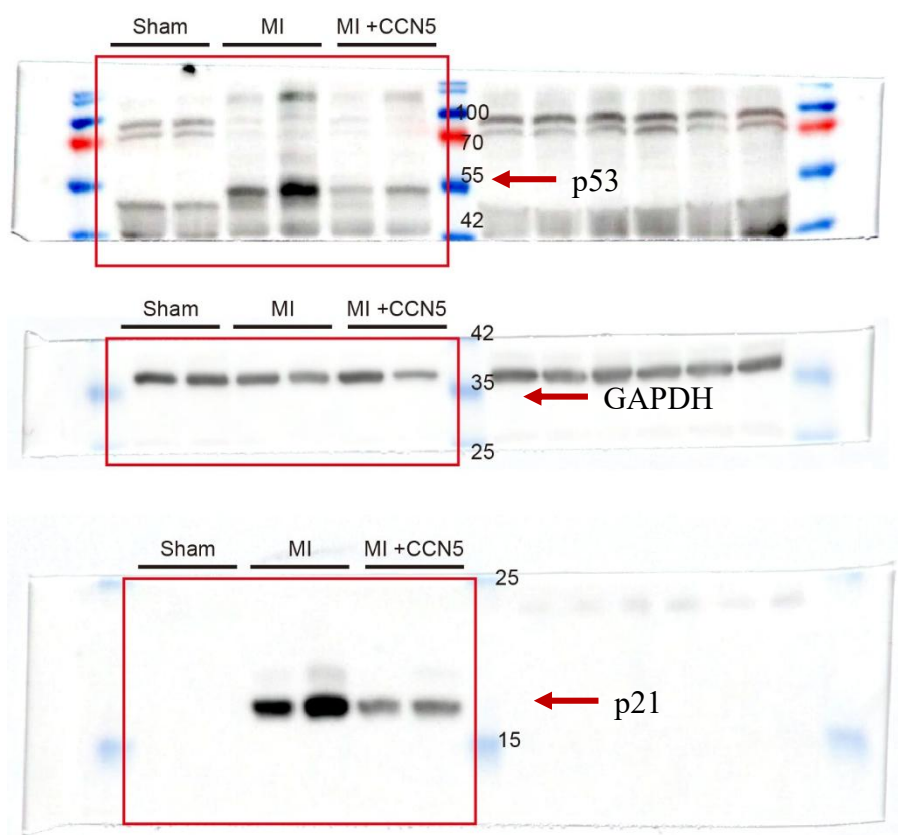



Supplementary Figure 1B

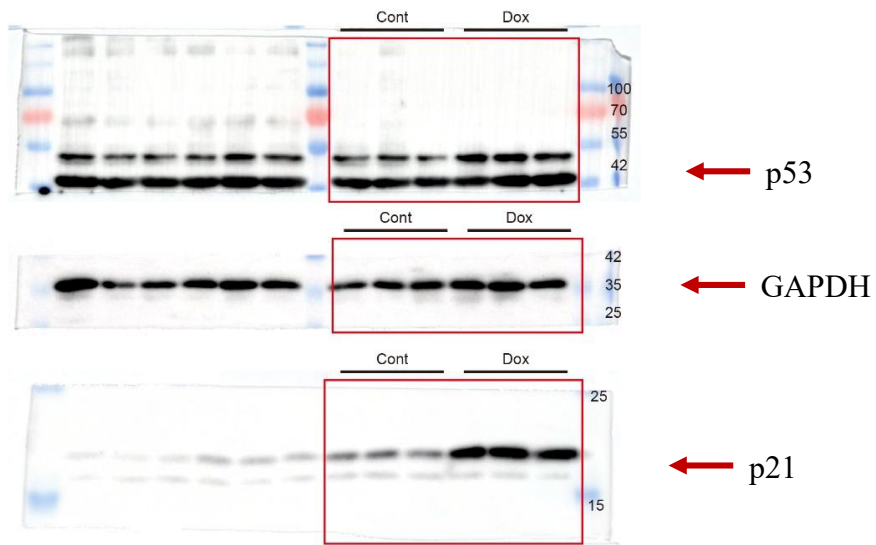

Supplementary Figure 1F

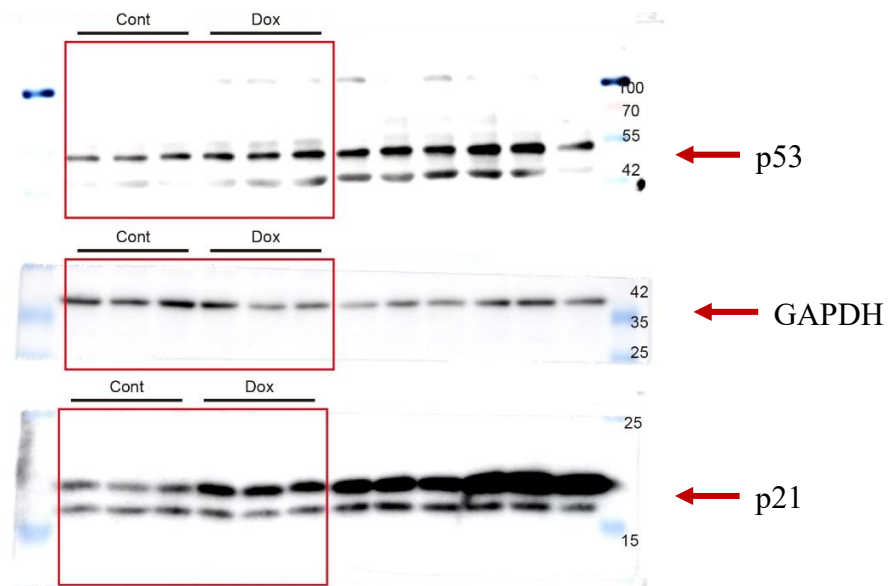

Supplementary Figure 2B

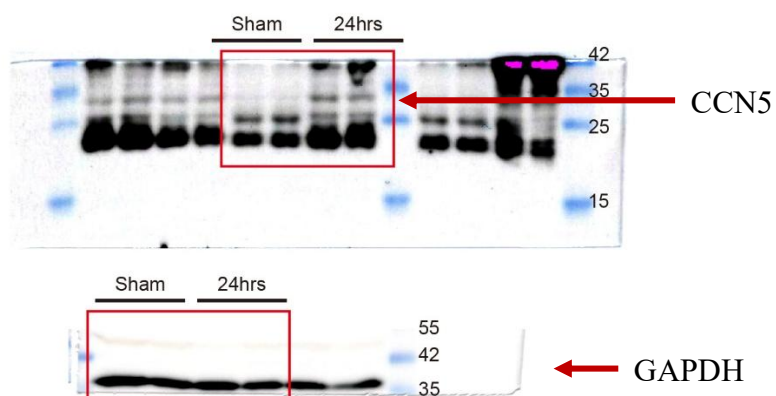

Supplement: Supplementary file 1 [file 3cdb92e5c9cb0677409c62b1.pdf]
